# Supplementary material for: Hierarchical nanofibrous silicon as replica of natural cellulose substance
Source: Royal Society of Chemistry journal article supplement (doi:10.1039/c1jm10282f), 2011-01-01
Supplement: c1jm10282f.pdf [file c1jm10282f.pdf]

## Supporting Information

### Hierarchical nanofibrous silicon as replica of natural cellulose substance

Yanhua Zhang and Jianguo Huang\*

Department of Chemistry, Zhejiang University, Hangzhou, Zhejiang 310027, China

E-mail: jghuang@zju.edu.cn

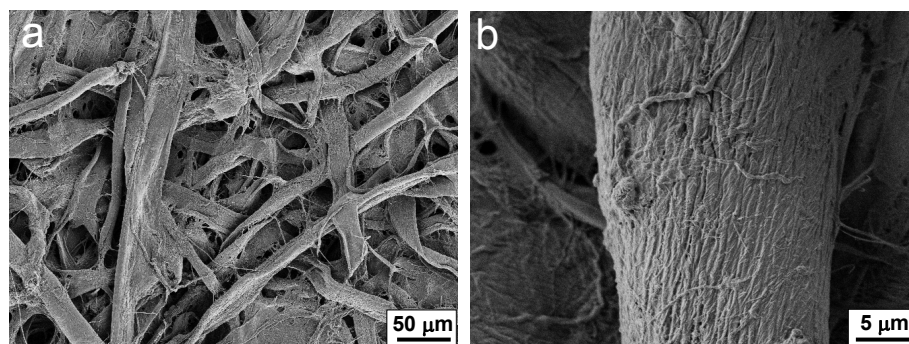

**Fig. S1** FE-SEM images of virgin filter paper at various magnifications, showing the cellulose microfibre network and each microfibre is composed of fine fibre assemblies.

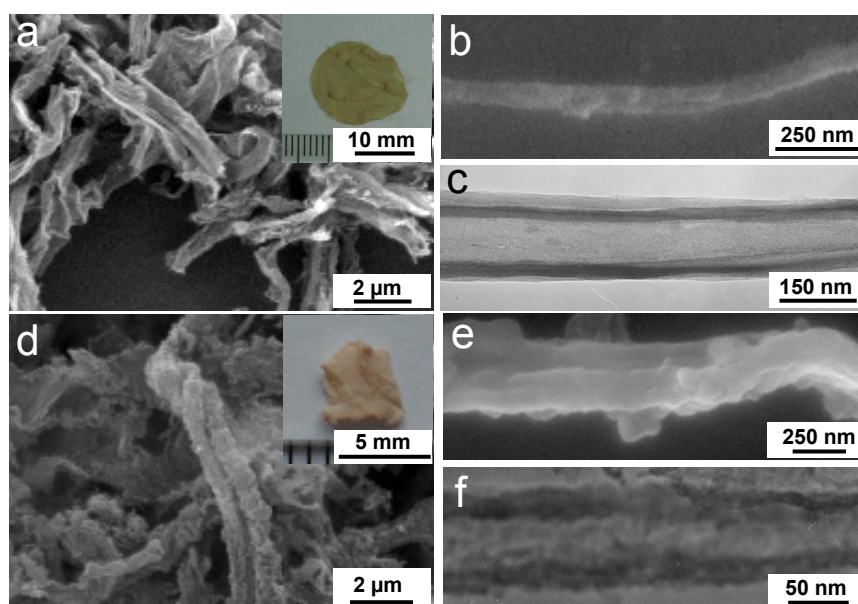

**Fig. S2** Silica thin film (thickness *ca.* 7.5 nm) pre-coated filter paper further modified with N-[3-(trimethoxysilyl)propyl]-ethylendiamine or (3-mercaptopropyl)trimethoxy-silane monolayers were found to selectively adsorb  $\text{Cu}^{2+}$  or  $\text{Hg}^{2+}$  ions respectively from diluted aqueous solutions. Calcination of the copper or mercury ion adsorbed filter paper resulted in nanotubular structured or  $\text{SiO}_2/\text{CuO}$  or  $\text{SiO}_2/\text{HgO}$  hybrid sheets (photographs shown in the insets of panels a and d). (a) and (b), Field emission scanning electron micrographs (FE-SEM) of the silica/copperoxide hybrid sheet; (d) and (e), FE-SEM images of the silica/mercuryoxide hybrid sheet. (c) and (f), Transmission electron micrographs (TEM) of the corresponding individual nanotubes, where the hollow tube structures are clearly visualized. (for reference, see: X. Zhang and J. Huang, *Chem. Commun.*, 2010, **46**, 6042.)
